# Supplementary material
Source: MDPI journal article supplement (https://www.mdpi.com/2071-1050/13/22/12614)
Supplement: s1 [file s1 › sustainability-1426440-supplementary.pdf]

Survey about Investigating the Influencing Factors of Teachers' Information  
and Communications Technology-Integrated Teaching Behaviors toward  
“Learner-Centered” Reform Using Structural Equation Modeling

**Prat I :** Demographic information (single choice)

1. Your working experience

- ☐ 0-3 years
- ☐ 3-10 years
- ☐ above 10 years

2. Your age

- ☐ 20~29 years old
- ☐ 30~39 years old
- ☐ 40~49 years old
- ☐ 50~59 years old

3. Your teaching section

- ☐ Primary School
- ☐ Middle School

4. Your title

- ☐ Advanced
- ☐ Non-Advanced

5. Your gender

- ☐ Female
- ☐ Male

**Prat II:** Platform evaluation (single choice)

1. I mainly used technology to support my interpretation when teaching.

- ☐ A. Strongly agree
- ☐ B. Agree
- ☐ C. Undecided
- ☐ D. Disagree
- ☐ E. Strongly disagree

2. I would like to use technology to present a more precise subject knowledge structure.

- ☐ A. Strongly agree
- ☐ B. Agree
- ☐ C. Undecided
- ☐ D. Disagree
- ☐ E. Strongly disagree

3. I would like use technology in the classroom mainly for the presentation of teaching content, in order to better transfer subject knowledge to students.

- ☐ A. Strongly agree
- ☐ B. Agree
- ☐ C. Undecided
- ☐ D. Disagree
- ☐ E. Strongly disagree

4. I would like use content presentation techniques to highlight the important and difficult points of the course to help students understand the content more deeply.

- ☐ A. Strongly agree
- ☐ B. Agree
- ☐ C. Undecided
- ☐ D. Disagree
- ☐ E. Strongly disagree

5. I would like to use the network, video, software, etc., to support students' cooperative learning and discussion.

- ☐ A. Strongly agree
- ☐ B. Agree
- ☐ C. Undecided
- ☐ D. Disagree
- ☐ E. Strongly disagree

6. I would like to use media materials, online information, subject tools, etc., to guide students to explore solutions to real problems.  
☐ A. Strongly agree ☐ B. Agree ☐ C. Undecided ☐ D. Disagree ☐ E. Strongly disagree
7. I would like encourage students to use technical and disciplinary resources to get more diversified solutions and make more diversified examples for the subject.  
☐ A. Strongly agree ☐ B. Agree ☐ C. Undecided ☐ D. Disagree ☐ E. Strongly disagree
8. I consciously cultivate students' ability to collect, sort out and apply subject knowledge through paper media, electronic media and the Internet.  
☐ A. Strongly agree ☐ B. Agree ☐ C. Undecided ☐ D. Disagree ☐ E. Strongly disagree
9. I always use automated evaluation and analytical statistical techniques to help students reflect on their learning and adjust their learning strategies.  
☐ A. Strongly agree ☐ B. Agree ☐ C. Undecided ☐ D. Disagree ☐ E. Strongly disagree
10. I think the use of technology in teaching can help students improve their learning effects.  
☐ A. Strongly agree ☐ B. Agree ☐ C. Undecided ☐ D. Disagree ☐ E. Strongly disagree
11. I think the use of technical in teaching can improve my professional recognition in the organization.  
☐ A. Strongly agree ☐ B. Agree ☐ C. Undecided ☐ D. Disagree ☐ E. Strongly disagree
12. The application of technology in teaching can help me improve my job evaluation requirements.  
☐ A. Strongly agree ☐ B. Agree ☐ C. Undecided ☐ D. Disagree ☐ E. Strongly disagree
13. The application of technology in teaching will enhance my interest in teaching exploration and innovation.  
☐ A. Strongly agree ☐ B. Agree ☐ C. Undecided ☐ D. Disagree ☐ E. Strongly disagree
14. I can flexibly choose different teaching methods and techniques for different content.  
☐ A. Strongly agree ☐ B. Agree ☐ C. Undecided ☐ D. Disagree ☐ E. Strongly disagree
15. I can assist other teachers to integrate information technology, teaching methods and teaching subjects.  
☐ A. Strongly agree ☐ B. Agree ☐ C. Undecided ☐ D. Disagree ☐ E. Strongly disagree
16. I can use technology and media to improve my teaching effect.  
☐ A. Strongly agree ☐ B. Agree ☐ C. Undecided ☐ D. Disagree ☐ E. Strongly disagree
17. I know how to solve the problem of technology application in teaching.  
☐ A. Strongly agree ☐ B. Agree ☐ C. Undecided ☐ D. Disagree ☐ E. Strongly disagree

18. I can get guidance from experts on the application of technology for teaching.  
○ A. Strongly agree ○ B. Agree ○ C. Undecided ○ D. Disagree ○ E. Strongly disagree
19. I can get support and encouragement from the leader.  
○ A. Strongly agree ○ B. Agree ○ C. Undecided ○ D. Disagree ○ E. Strongly disagree
20. I can get enough training or learning chance to improve my Information communication technology integrated teaching.  
○ A. Strongly agree ○ B. Agree ○ C. Undecided ○ D. Disagree ○ E. Strongly disagree
21. I feel supported by policies and institutions in Information communication technology integrated teaching.  
○ A. Strongly agree ○ B. Agree ○ C. Undecided ○ D. Disagree ○ E. Strongly disagree
22. I can get help from colleagues in the process of exploring Information communication technology integrated teaching.  
○ A. Strongly agree ○ B. Agree ○ C. Undecided ○ D. Disagree ○ E. Strongly disagree
23. The resources in the digital teaching platform are useful.  
○ A. Strongly agree ○ B. Agree ○ C. Undecided ○ D. Disagree ○ E. Strongly disagree
24. The application of teaching software is smooth and easy.  
○ A. Strongly agree ○ B. Agree ○ C. Undecided ○ D. Disagree ○ E. Strongly disagree
25. The function design of the teaching software is reasonable.  
○ A. Strongly agree ○ B. Agree ○ C. Undecided ○ D. Disagree ○ E. Strongly disagree
26. The school is equipped with sufficient information teaching facilities.  
○ A. Strongly agree ○ B. Agree ○ C. Undecided ○ D. Disagree ○ E. Strongly disagree
